# Supplementary material for: Antisense Morpholino-Based In Vitro Correction of a Pseudoexon-Generating Variant in the SGCB Gene
Source: MDPI journal article supplement (doi:10.3390/ijms23179817), 2022-08-29
Supplement: s1 [file s1]

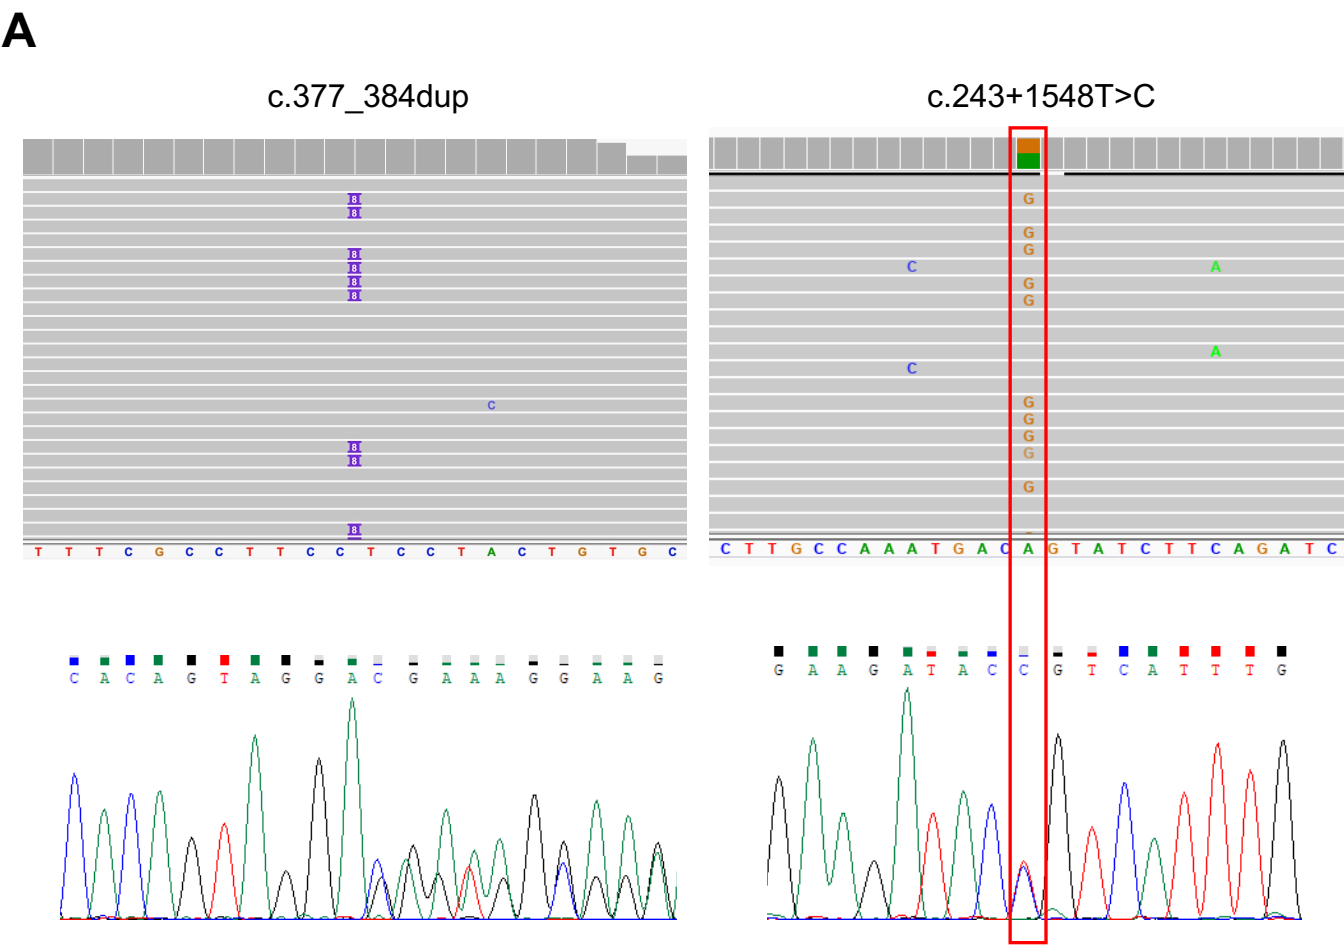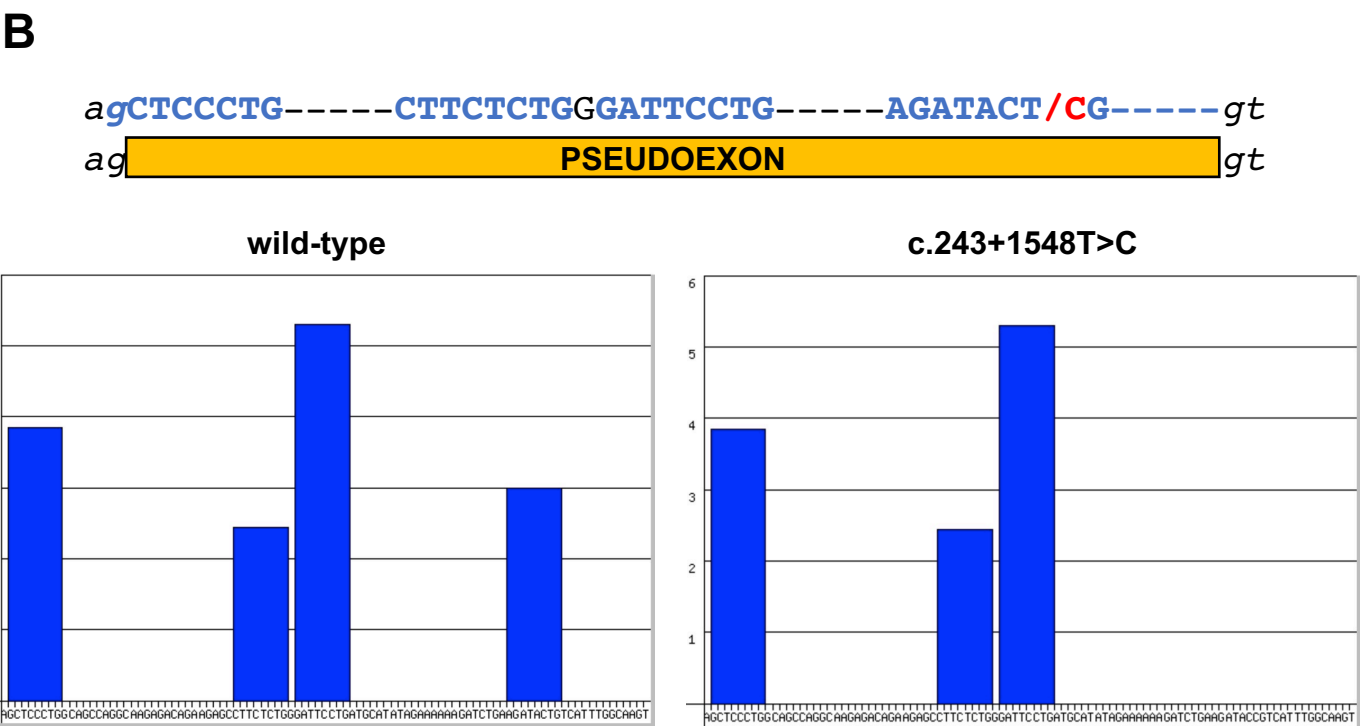

**Figure S1 Genetics findings in our Patient.** (A) Integrated Genomics Viewer (IGV) screenshots and sequence electropherograms displaying the *SGCB* variants detected in the Patient described in the manuscript. (B) ESE-finder 3.0 screenshots showing the prediction of the Serine And Arginine Rich Splicing Factor 2 (SRSF2) splicing factor binding sites (in blue in the sequence) in wild-type and mutated (c.243+1548T>C) sequence.

**A**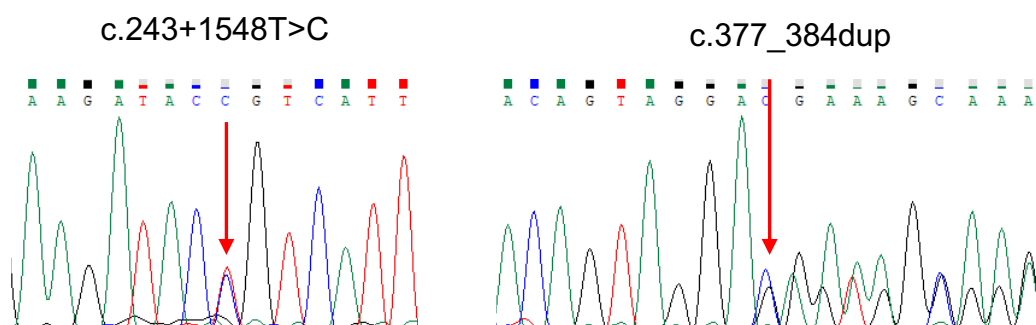**B**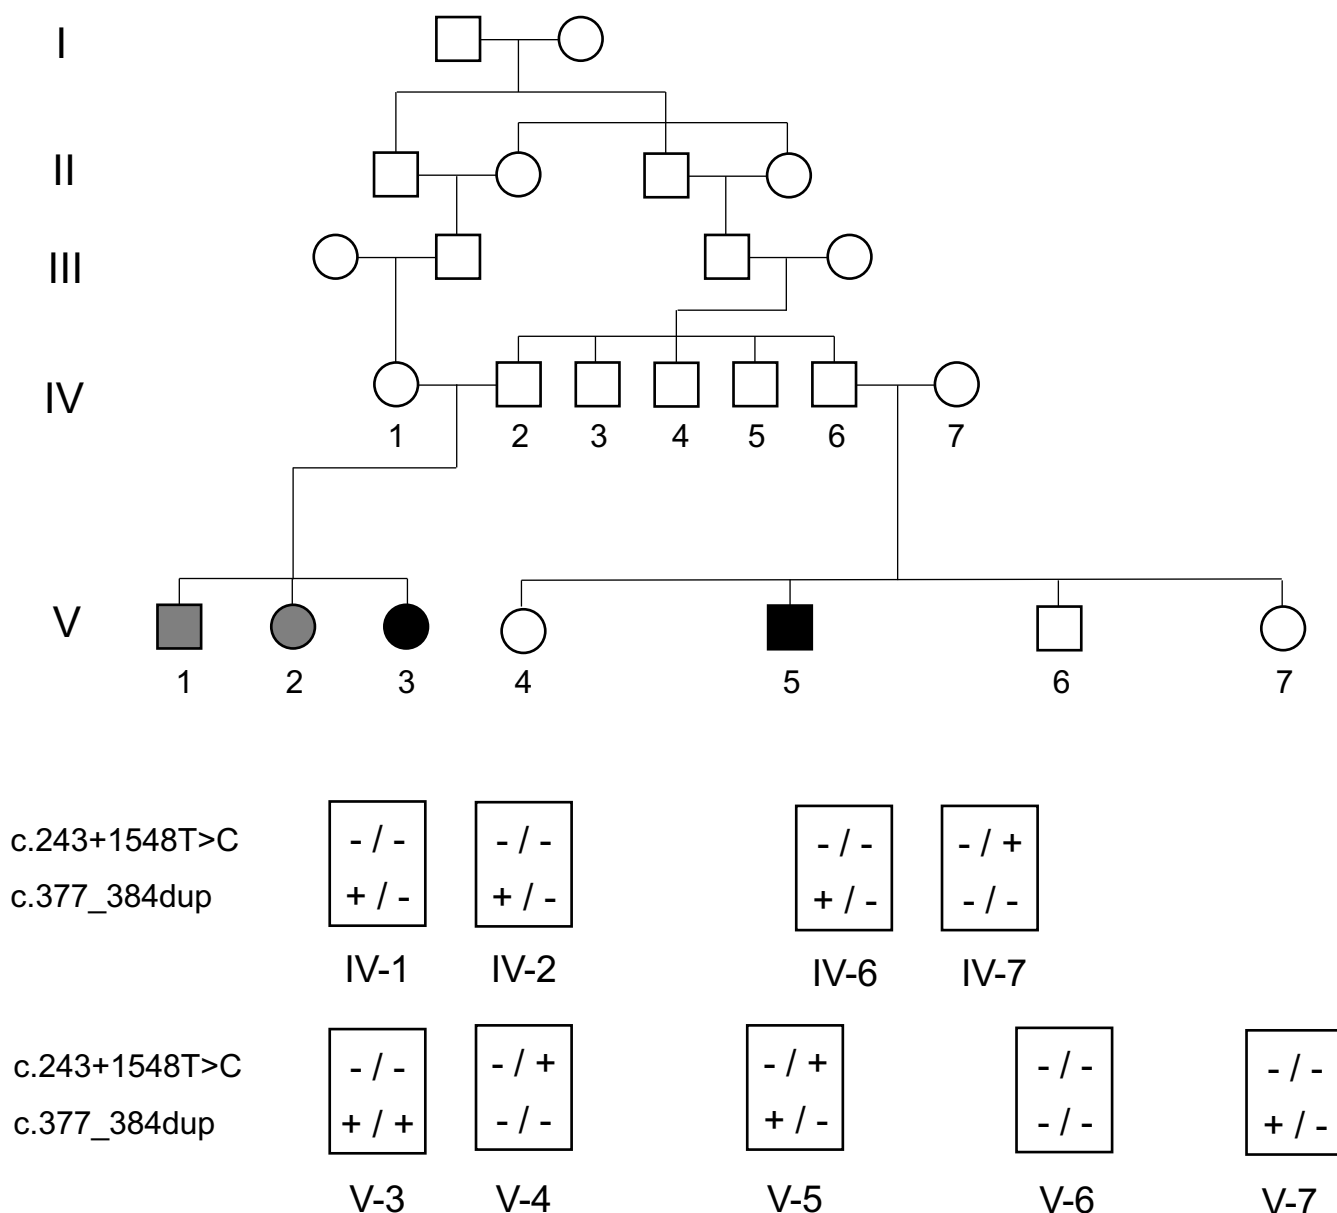

**Figure S2 Genetic findings in a previously reported LGMDR4 patient.** (A) Sequence electropherograms displaying the *SGCB* variants detected in the Patient V-A described in Barresi *et al.*, 2000. (B) Pedigree of the family described in Barresi *et al.*, 2000 now reporting the genotype of the *SGCB* c.243+1548T>C and c.377\_384dup variants in available family members.

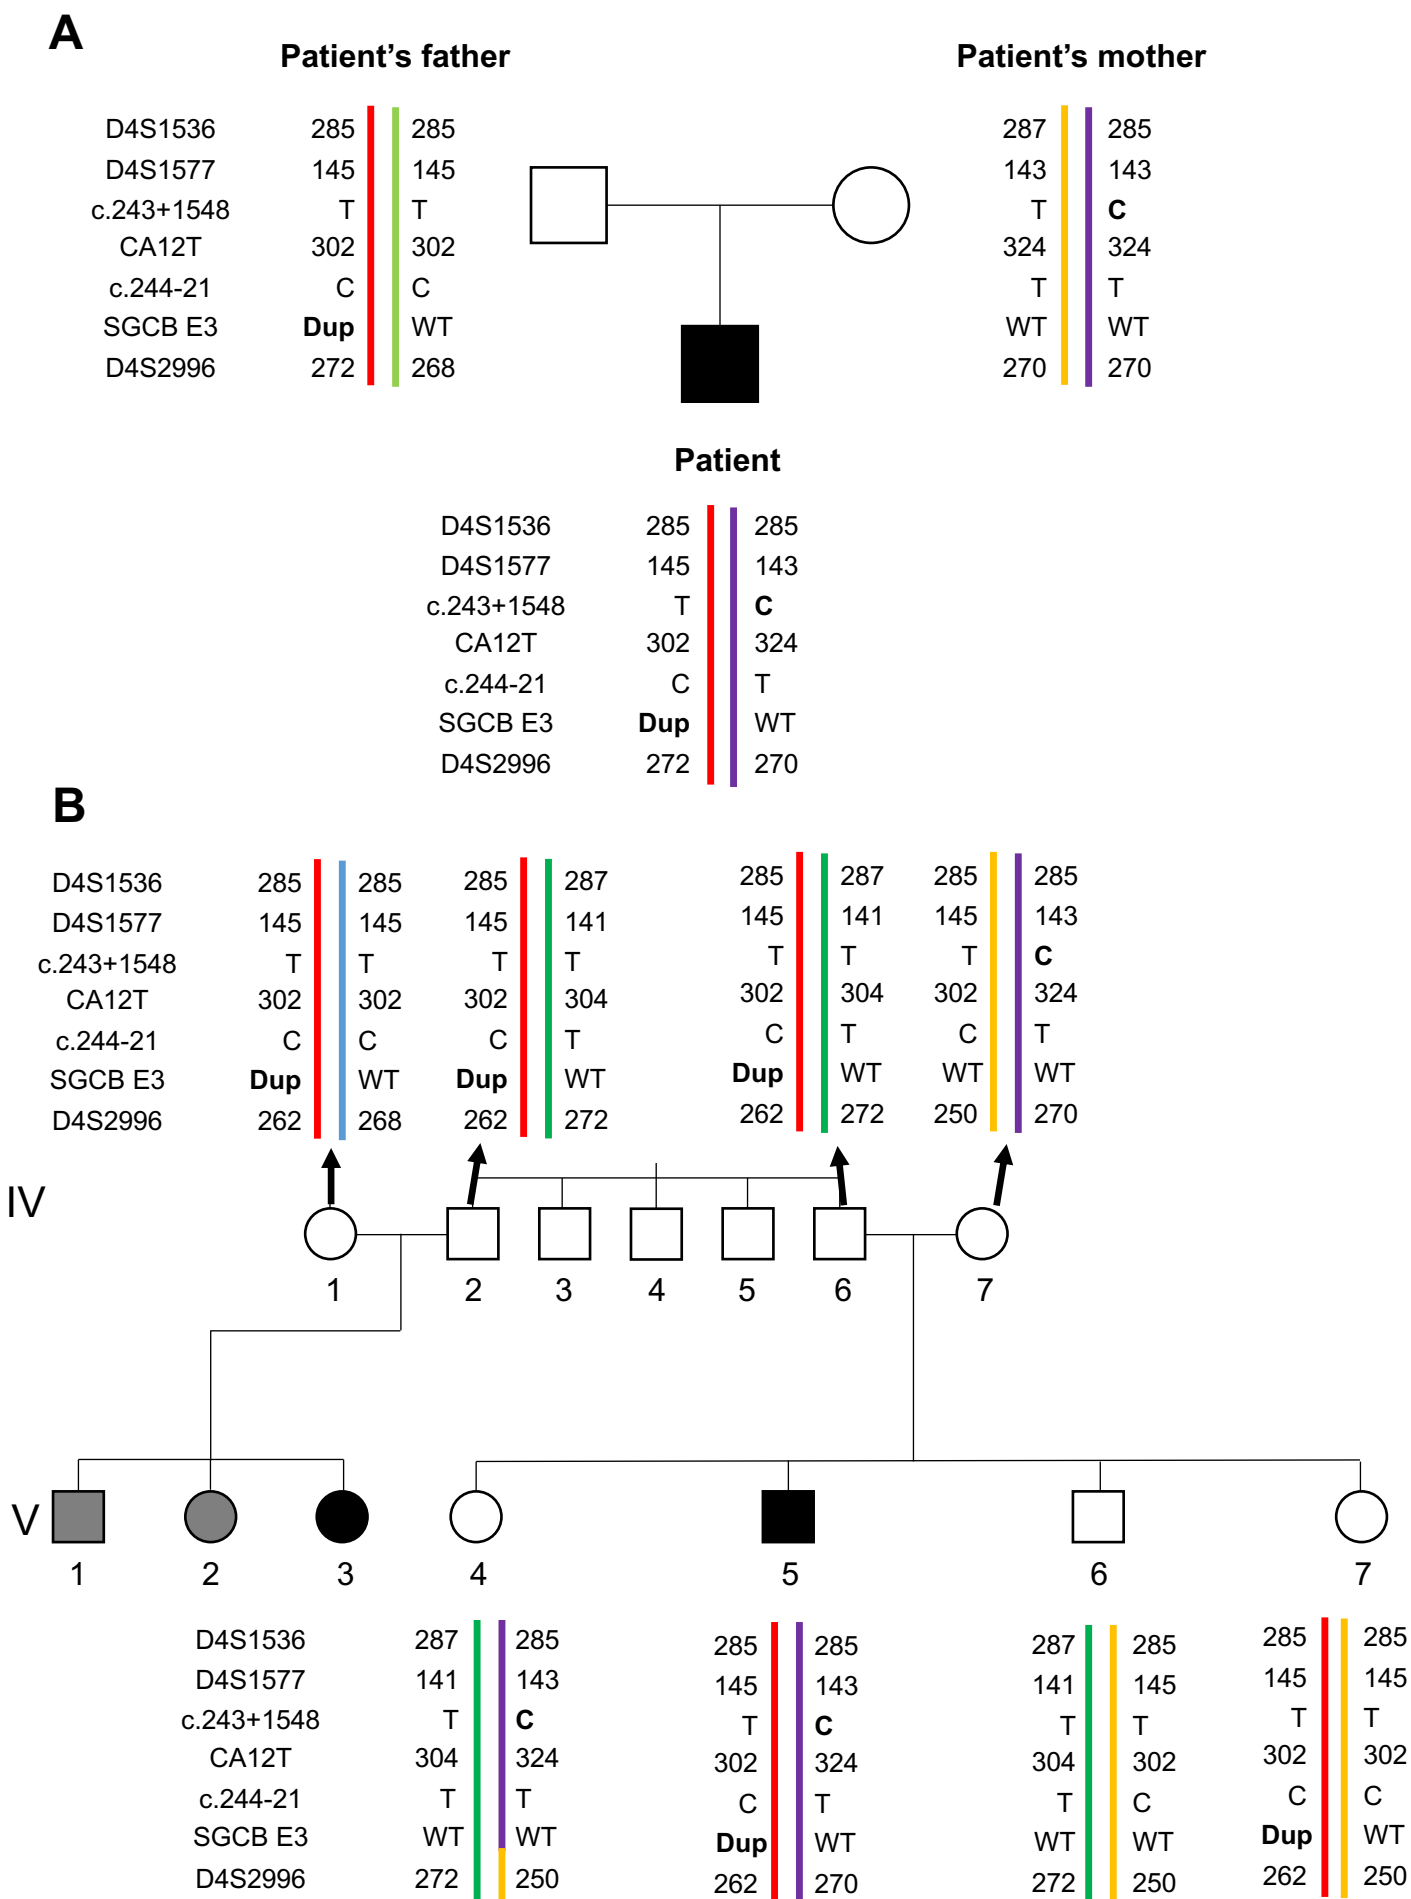

**Figure S3 Microsatellite analysis around SGCB locus in the pedigrees described.** Microsatellite markers analysis in the family described in the manuscript (A) and in the pedigree previously reported by Barresi *et al.*, 2000 (B). "Dup" indicates an allele harboring the c.377\_384dup mutation.

**A**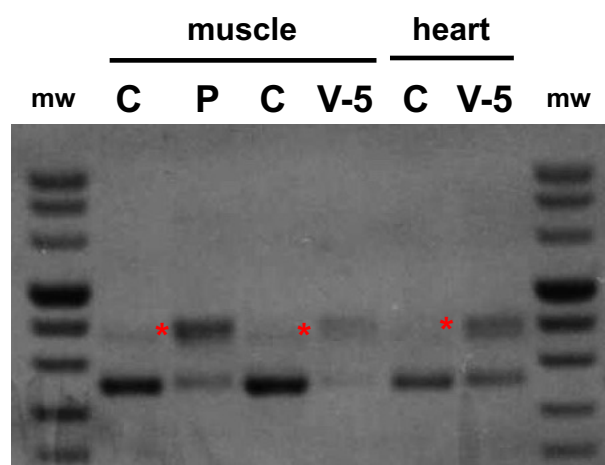**B**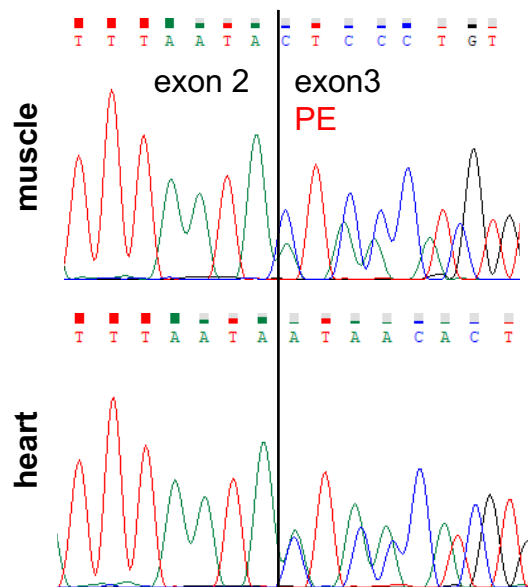**C**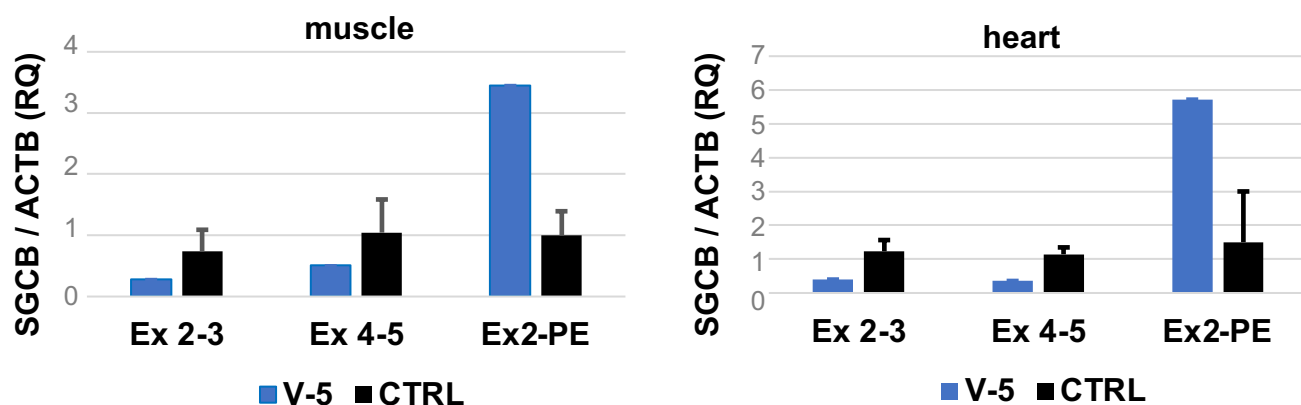**D**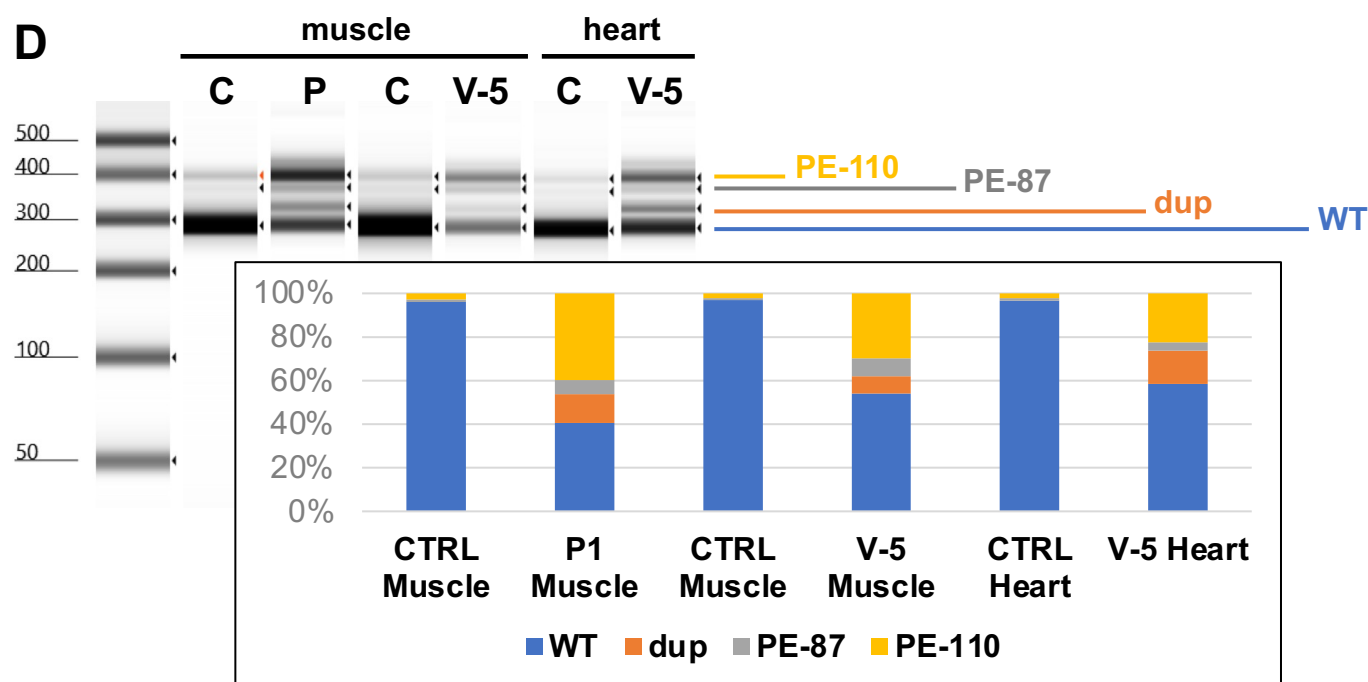

**Figure S4 Transcript analysis of SGCB in a previously described LGMDR4 patient.** (A) RT-PCR analysis of *SGCB* transcripts in tissues collected from the patient described in the manuscript (P), the previously-reported patient V-5 and controls (C). (B) Sequence electropherograms displaying the abnormal Exon2-PE junction in Patient V-5's tissues. (C) Quantitative RT-PCR experiments evaluating physiological (Ex2-Ex3, Ex4-Ex5) and abnormal (Ex2-PE) splicing junctions in Patient V-5's tissues and control biopsies (n=3). (D) Tape station analysis of RT-PCR amplicons showed in panel A documenting the presence of different levels of aberrant and physiological splicing products in patients' and control tissues.

**A**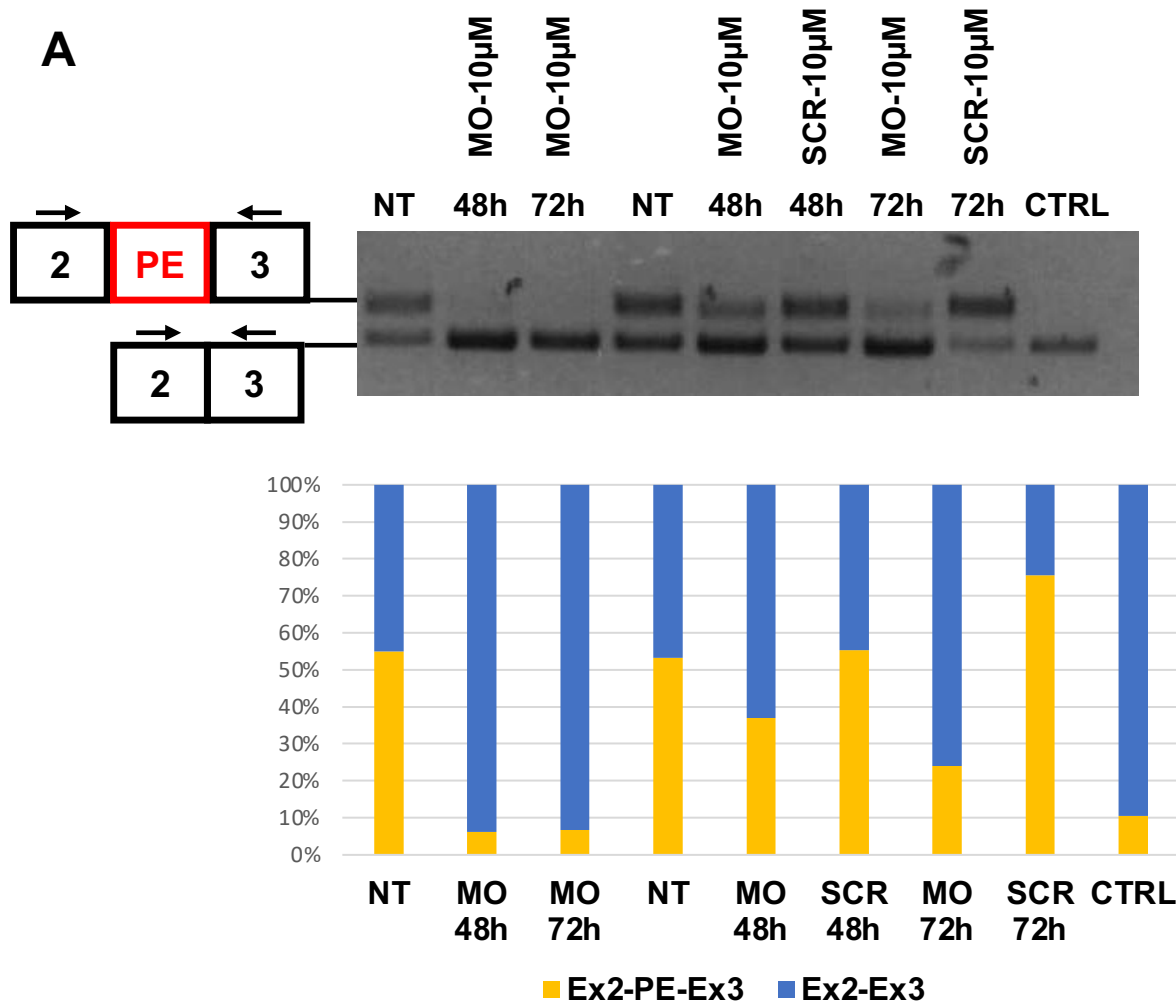**B**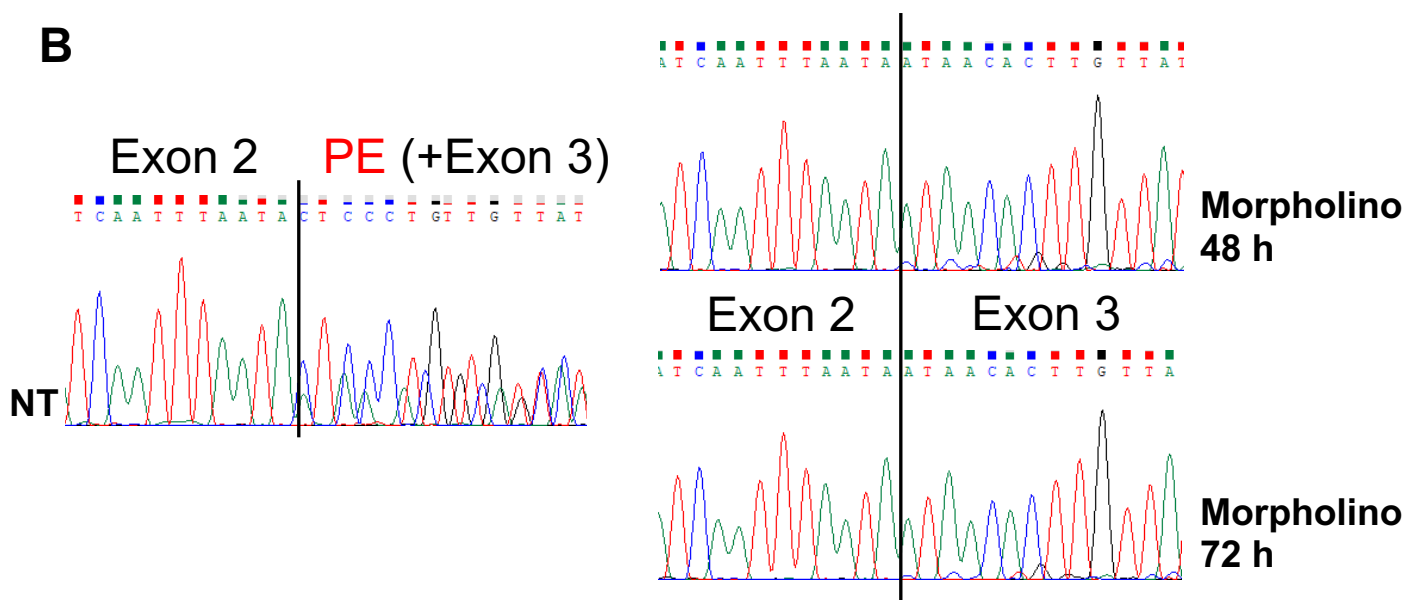

**Figure S5 In vitro correction of splicing defect after Morpholino treatment.** (A) RT-PCR analysis of *SGCB* transcript in patient's derived iPSC before (NT, untreated) and after the delivery of Morpholino 10  $\mu$ M (MO) documenting the correction of the splicing defect in treated cells. The delivery of a morpholino scrambled sequence (SCR) did not result in splicing correction. A control cell line was also included (CTRL). Bars under the gel represent the proportion of normally spliced (Ex2-Ex3) and abnormally-spliced (Ex2-PE-Ex3) *SGCB* transcripts, as calculated after densitometry. (B) Sequence electropherograms displaying the restoration of the physiological splicing after Morpholino delivery.

| Gene     | Inheritance | OMIM                                                                                   | Locus        |
|----------|-------------|----------------------------------------------------------------------------------------|--------------|
| ANO5     | AD, Ar      | 166260, 613319, 611307                                                                 | 11p14.3      |
| B3GALNT2 | Ar          | 615181                                                                                 | 1q42.3       |
| B4GAT1   | Ar          | 615287                                                                                 | 11q13.2      |
| BVES     | Ar          | 616812                                                                                 | 6q21         |
| CACNA1S  | AD          | 170400, 601887, 188580                                                                 | 1q32.1       |
| CAPN3    | AD, Ar      | 618129, 253600                                                                         | 15q15.1      |
| CAV3     | AD, DD      | 192600, 123320, 611818, 614321, 606072                                                 | 3p25.3       |
| CLCN1    | AD, Ar      | 160800, 255700                                                                         | 7q34         |
| COL6A1   | AD, Ar      | 158810, 254090                                                                         | 21q22.3      |
| COL6A2   | Ar, AD      | 255600, 158810, 254090                                                                 | 21q22.3      |
| DAG1     | Ar          | 616538, 613818                                                                         | 3p21.31      |
| DMD      | XLr         | 300376, 302045, 310200                                                                 | Xp21.2-p21.1 |
| DNAJB6   | AD          | 603511                                                                                 | 7q36.3       |
| DPM3     | Ar          | 618992, 618992                                                                         | 1q22         |
| DYSF     | Ar          | 254130, 253601, 606768                                                                 | 2p13.2       |
| FKRP     | Ar          | 613153, 606612, 607155                                                                 | 19q13.32     |
| FKTN     | Ar          | 611615, 253800, 613152, 611588                                                         | 9q31.2       |
| GAA      | Ar          | 232300                                                                                 | 17q25.3      |
| GFPT1    | Ar          | 610542                                                                                 | 2p13.3       |
| GMPPB    | Ar          | 615350, 615351, 615352                                                                 | 3p21.31      |
| POMGNT2  | Ar          | 614830, 618135                                                                         | 3p22.1       |
| HNRPDL   | AD          | 609115                                                                                 | 4q21.22      |
| CRPPA    | Ar          | 614643, 616052                                                                         | 7p21.2       |
| KCNJ2    | AD          | 170390, 613980, 609622                                                                 | 17q24.3      |
| LAMA2    | Ar          | 607855, 618138                                                                         | 6q22.33      |
| LARGE1   | Ar          | 613154, 608840                                                                         | 22q12.3      |
| LMNA     | AD, Ar      | 115200, 605588, 181350, 616516, 610140, 176670, 151660, 212112, 248370, 613205, 619793 | 1q22         |
| MYOF     | AD          | 619366                                                                                 | 10q23.33     |
| PLEC     | Ar, AD      | 616487, 131950, 226670, 612138, 613723                                                 | 8q24.3       |
| POGLUT1  | Ar, AD      | 617232, 615696                                                                         | 3q13.33      |
| POMGNT1  | Ar          | 253280, 613151, 613157, 617123                                                         | 1p34.1       |
| POMK     | Ar          | 616094, 615249                                                                         | 8p11.21      |
| POMT1    | Ar          | 236670, 613155, 609308                                                                 | 9q34.13      |
| POMT2    | Ar          | 613150, 613156, 613158                                                                 | 14q24.3      |
| POPDC3   | Ar          | 618848                                                                                 | 6q21         |
| PYROXD1  | Ar          | 617258                                                                                 | 12p12.1      |
| RYR1     | AD, Ar      | 117000, 619542, 255320, 145600                                                         | 19q13.2      |
| SCN4A    | AD, Ar      | 170500, 613345, 614198, 608390, 168300                                                 | 17q23.3      |
| SGCA     | Ar          | 608099                                                                                 | 17q21.33     |
| SGCB     | Ar          | 604286,                                                                                | 4q12         |
| SGCD     | Ar          | 606685, 601287                                                                         | 5q33.2-q33.3 |
| SGCG     | Ar          | 253700                                                                                 | 13q12.12     |
| SMPX     | XLD, XLR    | 300066, 301075                                                                         | Xp22.12      |
| TCAP     | AD, Ar      | 607487, 601954                                                                         | 17q12        |
| RXYLT1   | Ar          | 615041                                                                                 | 12q14.2      |
| TNPO3    | AD          | 608423                                                                                 | 7q32.1       |
| TOR1AIP1 | Ar          | 617072                                                                                 | 1q25.2       |

**Table S1:** Genes included in our NGS-panel.
